# Supplementary material for: Paramedic-supplied ‘Take Home’ Naloxone: protocol for cluster randomised feasibility study
Source: HighWire-hosted journal article supplement (doi:10.1136/bmjopen-2013-004712), 2014-03-01
Supplement: bmjopen-2013-004712supp_appendix2.pdf [file bmjopen-2013-004712supp_appendix2.pdf]

PATIENT CONSENT FORM

Please read each statement below and tick **each of the statements you agree with**, in the box provided. If you are able to tick all the boxes, please then sign the bottom of this form. If you are unable to tick all the boxes, please discuss this with the paramedic, as it may mean that you will not be able to have treatment under this PGD. If this is the case, you will be provided with information on how to access local services.

|  |  | **I AGREE** |
| --- | --- | --- |
| 1 | I confirm that to the best of my knowledge, I am not allergic to Naloxone Hydrochloride (or any of its ingredients). |  |
| 2 | I understand that my GP will be informed of the treatment that I am being offered (this is necessary in case of any problems). **If you do not wish for your GP to be informed, please indicate this by putting an X in the box to the right.** |  |
| 3 | I have had an opportunity to ask all the questions that I need to ask about Naloxone and the possible risks and benefits. |  |
| 4 | I have been provided with training on the use of Naloxone and have been supplied with information about the study. |  |
| 5 | I confirm that I am happy to be included in the study and have the Naloxone. I am signing this form voluntarily and without pressure. |  |
| 6 | I am aware that the needle supplied is strictly for **IM** Naloxone use only. |  |
| 7 | I understand that Naloxone is a specific drug that reverses opioid overdoses and should be used SOLELY for the purpose of saving lives. |  |

***Please note that agreeing to this last statement is optional, but the study team would appreciate the opportunity to learn your views on this study as it may help to improve services for others.***

| 8 | I agree to be contacted in 3 months time by a member of the study team.  ***In 3 months time, a member of the study team will contact you by telephone to ask for your views on the study. If we are unable to contact you by telephone, we will post a questionnaire to you, along with a pre-addressed envelope.***  **CONTACT NUMBER: _________________________________________** |  |
| --- | --- | --- |

_______________________ ________________ _____________________

PRINT your name here Date Signature

_______________________ ________________ _____________________

Printed name of Professional Date Signature

***Place the signed consent form together with the original PCR in the A4 envelope marked for the attention of The Paramedic Supplied Naloxone Study Team. Ensure the envelope is sealed and placed in a secure area on station for collection.***
